# Supplementary material
Source: PubMed Central journal article supplement (PMC7609606)
Supplement: NIHMS1610109-supplement-1.pdf [file NIHMS1610109-supplement-1.pdf]

Supplemental Table 1.

| Patient and Clinical Variables                    | Incontinent Cohorts (N = 159) | SUI Cohort (N = 50) | UII Cohort (N=109) | <i>p</i> -value          |
|---------------------------------------------------|-------------------------------|---------------------|--------------------|--------------------------|
| Age (years), mean (SD)                            | 59 (13)                       | 54 (14)             | 61 (13)            | <b>0.001<sup>a</sup></b> |
| Race/Ethnicity                                    |                               |                     |                    | 0.07 <sup>b</sup>        |
| -White                                            | 112 (70%)                     | 33 (66%)            | 79 (72%)           |                          |
| -Hispanic                                         | 20 (13%)                      | 8 (16%)             | 12 (11%)           |                          |
| -Black                                            | 20 (13%)                      | 3 (6%)              | 17 (16%)           |                          |
| -Asian                                            | 1 (1%)                        | 1 (2%)              | 0 (0%)             |                          |
| -Other                                            | 6 (4%)                        | 5 (10%)             | 1 (1%)             |                          |
| BMI (kg/m <sup>2</sup> ), mean (SD)               | 31.2 (8.3)                    | 30.2 (6.9)          | 31.7 (8.8)         | 0.16 <sup>a</sup>        |
| Sexually Active                                   | 53 (53%) (N=100)              | 27 (54%) (N=50)     | 26 (52%) (N=50)    | 0.84                     |
| Current Anticholinergic Treatment                 | 10 (6%)                       | 2 (4%)              | 8 (7%)             | 0.42                     |
| Use of Hormone Replacement Therapy                | 19 (12%)                      | 4 (8%)              | 15 (14%)           | 0.30                     |
| Diabetes                                          | 21 (13%)                      | 9 (18%)             | 13 (12%)           | 0.30                     |
| Heart Disease                                     | 17 (11%)                      | 3 (6%)              | 14 (13%)           | 0.19                     |
| Hypertension                                      | 66 (42%)                      | 18 (36%)            | 48 (44%)           | 0.34                     |
| Urine Dipstick:                                   |                               |                     |                    |                          |
| - White Blood Cells (WBC)                         | 2 (1%)                        | 0 (0%)              | 2 (2%)             | 0.74                     |
| - Nitrites                                        | 0 (0%)                        | 0 (0%)              | 0 (0%)             | 1                        |
| - Red Blood Cells (RBC)                           | 23 (14%)                      | 6 (12%)             | 17 (16%)           | 0.55                     |
| Urinary Distress Inventory (UDI) Score, mean (SD) | 95.04 (51.03)                 | 97.95 (55.36)       | 93.71 (49.12)      | 0.31 <sup>a</sup>        |
| EQUC-Positive Specimen                            | 131 (82%)                     | 43 (86%)            | 88 (81%)           | 0.42                     |

Chi-square test used unless otherwise indicated. SD = standard deviation.

a – two sample t test, b – Fisher’s exact test

Bold – significant p value
